# Supplementary material
Source: Springer Nature journal article supplement (https://www.springermedizin.de/resource/supplementary/12876_2008_307_MOESM2_ESM.pdf/9439126)

Review: Probiotics data only  
 Comparison: 01 Probiotics Vs control  
 Outcome: 02 overall improvements dichotomous

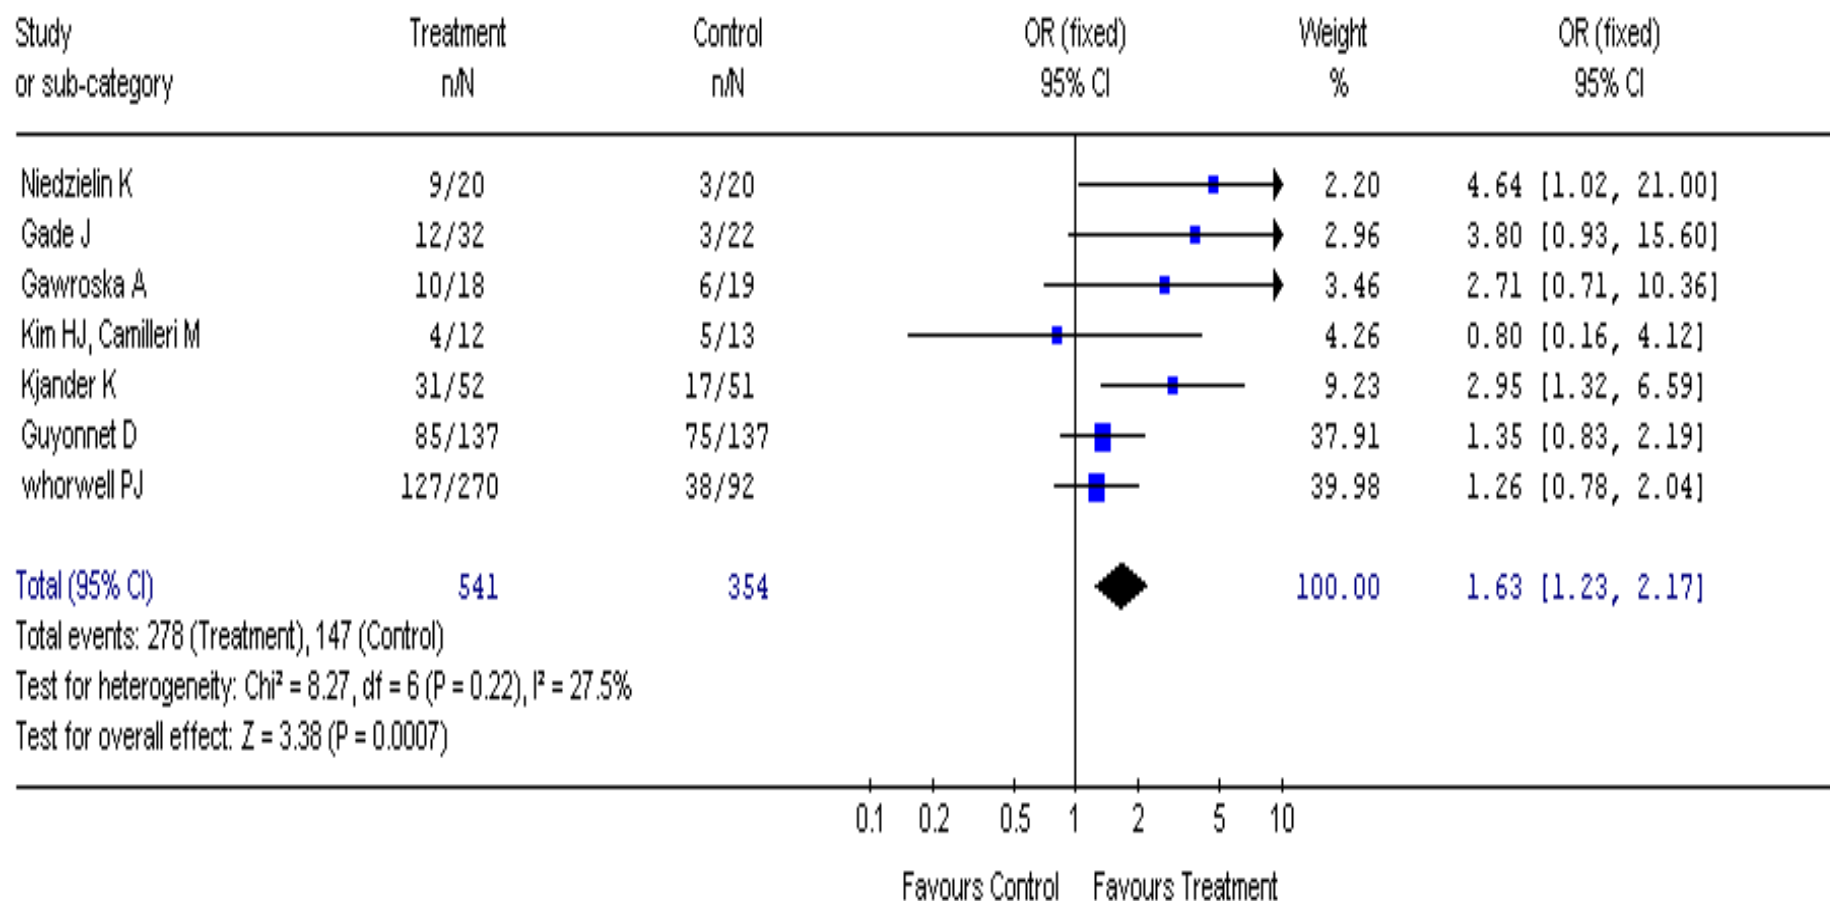

Supplement: MOESM2 [file 9439126]
